# Supplementary material
Source: PubMed Central journal article supplement (PMC4067271)
Supplement: supp_138.22.4843_DEV070284TableS1.pdf [file supp_138.22.4843_DEV070284TableS1.pdf]

**Table S1. Genes showed alterations in expression in the skin of *Lhx2*<sup>-/-</sup> mice versus wild-type controls in microarrays and association of *Lhx2* with the corresponding promoter regions in CHIP-on-chip assay**

**Adhesion/extracellular matrix**

| Gene symbol | Gene full name | Accession Number | Fold change | ChIP on chip: distance to TSS (nearest peak) (bp) |
|-------------|----------------|------------------|-------------|---------------------------------------------------|
|-------------|----------------|------------------|-------------|---------------------------------------------------|

**Downregulated**

|         |                                                               |           |        |       |
|---------|---------------------------------------------------------------|-----------|--------|-------|
| Perp    | PERP; TP53 apoptosis effector                                 | NM_022032 | -11.02 | -7081 |
| Dsc1    | desmocollin 1                                                 | NM_013504 | -4.38  | -991  |
| Adamts1 | ADAMTS-like 1                                                 | NM_029967 | -2.87  | -5027 |
| Mmrn1   | multimerin 1                                                  | XM_284198 | -2.6   | -3368 |
| Col9a1  | collagen; type IX; alpha 1                                    | NM_007740 | -2.47  | -4226 |
| Ush2a   | Usher syndrome 2A (autosomal recessive; mild) homolog (human) | NM_021408 | -2.3   | -117  |
| Fgl1    | fibrinogen-like protein 1                                     | AK083397  | -2.04  | -8158 |
| Siglech | sialic acid binding Ig-like lectin H                          | NM_178706 | -1.91  | -117  |
| Cntn3   | contactin 3                                                   | NM_008779 | -1.84  | -117  |

**Upregulated**

|         |                                                             |              |       |       |
|---------|-------------------------------------------------------------|--------------|-------|-------|
| Fgg     | fibrinogen gamma chain                                      | NM_133862    | 44.77 | -1125 |
| Ibsp    | integrin binding sialoprotein                               | NM_008318    | 40.38 | 4505  |
| C8b     | complement component 8; beta polypeptide                    | NM_133882    | 31.22 | 142   |
| Crp     | C-reactive protein; pentraxin-related                       | NM_007768    | 28.1  | -3270 |
| Gja3    | gap junction protein; alpha 3                               | AK053849     | 27.24 | -117  |
| Cldn8   | claudin 8                                                   | NM_018778    | 22.23 | 59979 |
| Nrxn1   | neurexin I                                                  | NM_020252    | 21.92 | 4692  |
| A2m     | alpha-2-macroglobulin                                       | NM_175628    | 20.61 | -117  |
| Vit     | Vitrin                                                      | NM_028813    | 20.3  | 2310  |
| F11     | coagulation factor XI                                       | NM_028066    | 16.12 | 1606  |
| Gpm6a   | glycoprotein m6a                                            | S65735       | 14.01 | -9739 |
| Col10a1 | collagen; type X; alpha 1                                   | NM_009925    | 13.52 | 801   |
| Col19a1 | collagen; type XIX; alpha 1                                 | NM_007733    | 13.24 | -353  |
| Fgb     | fibrinogen beta chain                                       | NM_181849    | 12.33 | -1427 |
| Rhag    | Rhesus blood group-associated A glycoprotein                | NM_011269    | 12.16 | -4645 |
| Anks1b  | ankyrin repeat and sterile alpha motif domain containing 1B | XM_001003400 | 11.57 | -117  |
| Upk2    | uroplakin 2                                                 | NM_009476    | 11.22 | -117  |
| Spp1    | secreted phosphoprotein 1                                   | NM_009263    | 10.24 | -5677 |
| Pcdhb7  | protocadherin beta 7                                        | NM_053132    | 10.2  | 225   |

|         |                                                                  |           |      |        |
|---------|------------------------------------------------------------------|-----------|------|--------|
| Vnn1    | vanin 1                                                          | NM_011704 | 9.88 | 148250 |
| Olfml2b | olfactomedin-like 2B                                             | NM_177068 | 9.69 | -1687  |
| Clec14a | C-type lectin domain family 14; member a                         | NM_025809 | 8.61 | -117   |
| Fat4    | FAT tumor suppressor homolog 4 (Drosophila)                      | AK034552  | 8.04 | -117   |
| Cdh22   | cadherin 22                                                      | NM_174988 | 7.96 | 2293   |
| Clec4a2 | C-type lectin domain family 4; member a2                         | NM_011999 | 7.34 | -186   |
| Tnn     | tenascin N                                                       | NM_177839 | 7.2  | -5025  |
| Cntnap2 | contactin associated protein-like 2                              | NM_025771 | 7.2  | -117   |
| Lrfn5   | leucine rich repeat and fibronectin type III domain containing 5 | AK083920  | 7.17 | -598   |
| Thbs4   | thrombospondin 4                                                 | NM_011582 | 6.98 | -117   |
| C6      | complement component 6                                           | NM_016704 | 6.18 | -117   |
| Gja5    | gap junction protein; alpha 5                                    | NM_008121 | 5.83 | -117   |
| Cfhr1   | complement factor H-related 1                                    | NM_015780 | 5.79 | -3372  |
| Cdh20   | cadherin 20                                                      | NM_011800 | 5.75 | -117   |
| Alb     | Albumin                                                          | NM_009654 | 5.4  | -4057  |
| Ctnna2  | catenin (cadherin associated protein); alpha 2                   | NM_009819 | 5.37 | -117   |
| Gp2     | glycoprotein 2 (zymogen granule membrane)                        | NM_025989 | 5.09 | -117   |
| Fcgr1   | Fc receptor; IgG; high affinity I                                | NM_010186 | 4.97 | -7197  |
| Kera    | Keratocan                                                        | NM_008438 | 4.87 | -4868  |
| Vsig4   | V-set and immunoglobulin domain containing 4                     | NM_177789 | 4.34 | -8131  |
| Lrrn1   | leucine rich repeat protein 1; neuronal                          | NM_008516 | 4.34 | 1566   |
| Siglec1 | sialic acid binding Ig-like lectin 1; sialoadhesin               | NM_011426 | 3.88 | 745    |
| Cldn17  | claudin 17                                                       | NM_181490 | 3.7  | 83280  |
| Nphs1   | nephrosis 1 homolog; nephrin (human)                             | NM_019459 | 3.36 | 2927   |
| Cntn6   | contactin 6                                                      | NM_017383 | 3.17 | -2476  |
| Pcdhb15 | protocadherin beta 15                                            | NM_053140 | 3.05 | 638    |
| Lum     | Lumican                                                          | NM_008524 | 2.83 | -4868  |
| Lypd1   | Ly6/Plaur domain containing 1                                    | NM_145100 | 2.69 | -5818  |
| Vcan    | Versican                                                         | AK087780  | 2.54 | 7703   |
| Mug1    | murinoglobulin 1                                                 | NM_008645 | 2.53 | 394    |
| Pcdh20  | protocadherin 20                                                 | NM_178685 | 2.45 | 2440   |
| Pcdhb6  | protocadherin beta 6                                             | NM_053131 | 2.44 | 725    |
| Cdh17   | cadherin 17                                                      | NM_019753 | 2.31 | -117   |
| Lrrc33  | leucine rich repeat containing 33                                | NM_146069 | 2.22 | 670    |
| Cd84    | CD84 antigen                                                     | NM_013489 | 2.2  | -4331  |
| Vsig1   | V-set and immunoglobulin domain containing 1                     | NM_030181 | 2.1  | -117   |
| Itm2a   | integral membrane protein 2A                                     | NM_008409 | 2.06 | -7212  |

|         |                                      |           |      |      |
|---------|--------------------------------------|-----------|------|------|
| Siglec5 | sialic acid binding Ig-like lectin 5 | NM_145581 | 1.74 | 2219 |
|---------|--------------------------------------|-----------|------|------|

**Apoptosis**

| Gene symbol        | Gene full name                       | Accession Number | Fold change | ChIP on chip: distance to TSS (nearest peak) (bp) |
|--------------------|--------------------------------------|------------------|-------------|---------------------------------------------------|
| <b>Upregulated</b> |                                      |                  |             |                                                   |
| Bcl2l14            | BCL2-like 14 (apoptosis facilitator) | NM_025778        | 6.73        | -3910                                             |
| Xrn1               | 5'-3' exoribonuclease 1              | NM_011916        | 3.57        | 971                                               |
| Casp1              | caspase 1                            | NM_009807        | 2.72        | -734                                              |

**Cell cycle**

| Gene symbol          | Gene full name                                  | Accession Number | Fold change | ChIP on chip: distance to TSS (nearest peak) (bp) |
|----------------------|-------------------------------------------------|------------------|-------------|---------------------------------------------------|
| <b>Downregulated</b> |                                                 |                  |             |                                                   |
| Pak3                 | p21 protein (Cdc42/Rac)-activated kinase 3      | NM_008778        | -2.93       | -117                                              |
| <b>Upregulated</b>   |                                                 |                  |             |                                                   |
| Sesn1                | sestrin 1                                       | NM_001013370     | 5.01        | 9048                                              |
| Dbc1                 | deleted in bladder cancer 1 (human)             | NM_019967        | 4.38        | -4295                                             |
| Cgrrf1               | cell growth regulator with ring finger domain 1 | NM_026832        | 1.97        | -7155                                             |

**Cytoskeleton/cell differentiation and motility**

| Gene symbol          | Gene full name                  | Accession Number | Fold change | ChIP on chip: distance to TSS (nearest peak) (bp) |
|----------------------|---------------------------------|------------------|-------------|---------------------------------------------------|
| <b>Downregulated</b> |                                 |                  |             |                                                   |
| Sprr2d               | small proline-rich protein 2D   | NM_011470        | -53.58      | 2468                                              |
| Lor                  | Loricrin                        | NM_008508        | -20.32      | -4374                                             |
| Lce1c                | late cornified envelope 1C      | NM_028622        | -17.78      | -117                                              |
| Lce1a2               | late cornified envelope 1A2     | NM_028625        | -11.1       | -4374                                             |
| Dnalc1               | dynein; axonemal; light chain 1 | NM_028821        | -7.76       | 195                                               |
| Lce1i                | late cornified envelope 1I      | NM_029667        | -4.82       | 34966                                             |
| Dnahc9               | dynein; axonemal; heavy chain 9 | AK044263         | -4.65       | 113910                                            |
| Myoz3                | myozenin 3                      | NM_133363        | -3.93       | -1371                                             |

|                    |                                                                     |              |       |        |
|--------------------|---------------------------------------------------------------------|--------------|-------|--------|
| Gabarap1           | gamma-aminobutyric acid (GABA) A receptor-associated protein-like 1 | NM_020590    | -3.88 | 127    |
| Lce1h              | late cornified envelope 1H                                          | NM_026335    | -3.68 | -1897  |
| Lce1e              | late cornified envelope 1E                                          | NM_026811    | -3    | -4374  |
| Krtap13            | keratin associated protein 13                                       | NM_010671    | -2.86 | -2785  |
| Dnahc11            | dynein; axonemal; heavy chain 11                                    | NM_010060    | -2.13 | -117   |
| Strn               | striatin; calmodulin binding protein                                | AK032712     | -1.97 | -2243  |
| <b>Upregulated</b> |                                                                     |              |       |        |
| Tspyl4             | TSPY-like 4                                                         | NM_030203    | 47.7  | 3124   |
| Sst                | Somatostatin                                                        | NM_009215    | 44.49 | -7301  |
| Krt25              | keratin 25                                                          | NM_133730    | 27.08 | 5286   |
| Spnb1              | spectrin beta 1                                                     | NM_013675    | 20.29 | 743    |
| Krtap8-1           | keratin associated protein 8-1                                      | AK133727     | 19.75 | -4100  |
| Krtap13-1          | keratin associated protein 13-1                                     | NM_183189    | 17.84 | -21    |
| Myh4               | myosin; heavy polypeptide 4; skeletal muscle                        | NM_010855    | 16.78 | -227   |
| Krtap6-1           | keratin associated protein 6-1                                      | NM_010672    | 12.89 | -19039 |
| Frdm5              | FERM domain containing 5                                            | NM_172673    | 12.89 | -5534  |
| Dtna               | dystrobrevin alpha                                                  | NM_010087    | 12.26 | -1558  |
| Ttn                | Titin                                                               | NM_011652    | 9.61  | -2619  |
| Eya4               | eyes absent 4 homolog (Drosophila)                                  | AK081454     | 9.56  | -4146  |
| Coro1a             | coronin; actin binding protein 1A                                   | NM_009898    | 9.48  | -2738  |
| Krtap16-7          | keratin associated protein 16-7                                     | NM_028621    | 8.54  | 6448   |
| Krtap3-3           | keratin associated protein 3-3                                      | NM_025524    | 8.27  | -3430  |
| Kif12              | kinesin family member 12                                            | NM_010616    | 6.59  | -4002  |
| Tmod2              | tropomodulin 2                                                      | NM_001038710 | 6.42  | 10677  |
| Lrrcc1             | leucine rich repeat and coiled-coil domain containing 1             | NM_028915    | 6.25  | 3027   |
| Sntg2              | syntrophin; gamma 2                                                 | NM_172951    | 6.24  | -5489  |
| Krtap16-4          | keratin associated protein 16-4                                     | NM_130873    | 6.21  | -2     |
| Lmod2              | leiomodulin 2 (cardiac)                                             | NM_053098    | 5.83  | 398    |
| Ambn               | Ameloblastin                                                        | NM_009664    | 5.08  | -3134  |
| Ift74              | intraflagellar transport 74 homolog (Chlamydomonas)                 | NM_026319    | 4.7   | 4772   |
| Dysf               | Dysferlin                                                           | NM_001077694 | 4.03  | -22    |
| Nek3               | NIMA (never in mitosis gene a)-related expressed kinase             | NM_011848    | 3.84  | -618   |

| 3      |                                                                  |              |      |       |
|--------|------------------------------------------------------------------|--------------|------|-------|
| Wasf1  | WASP family 1                                                    | NM_031877    | 3.69 | 7624  |
| Scin   | Scinderin                                                        | NM_009132    | 3.19 | -5378 |
| Ndn    | Necdin                                                           | NM_010882    | 3.13 | -117  |
| Myot   | Myotilin                                                         | NM_001033621 | 2.82 | 2215  |
| Odam   | odontogenic; ameloblast associated                               | NM_027128    | 2.64 | -1293 |
| Fmn2   | formin 2                                                         | NM_019445    | 2.54 | 4916  |
| Spnb2  | spectrin beta 2                                                  | NM_175836    | 2.33 | -232  |
| Myl1   | myosin; light polypeptide 1                                      | NM_021285    | 2.27 | -8043 |
| Fez1   | fasciculation and elongation protein zeta 1 (zygin I)            | BC029629     | 2.25 | -1082 |
| Snca   | synuclein; alpha                                                 | NM_001042451 | 2.08 | -89   |
| Tubb2b | tubulin; beta 2B                                                 | NM_023716    | 2.05 | -3258 |
| Lce1l  | late cornified envelope 1L                                       | NM_028628    | 1.84 | -2202 |
| Nedd9  | neural precursor cell expressed; otherally down-regulated gene 9 | NM_017464    | 1.81 | 2954  |
| Klhl1  | kelch-like 1 (Drosophila)                                        | NM_053105    | 1.7  | -117  |

## Metabolism

| Gene symbol          | Gene full name                                                                  | Accession Number | Fold change | ChIP on chip:<br>distance to TSS<br>(nearest peak)<br>(bp) |
|----------------------|---------------------------------------------------------------------------------|------------------|-------------|------------------------------------------------------------|
| <b>Downregulated</b> |                                                                                 |                  |             |                                                            |
| Hbb-y                | hemoglobin Y; beta-like embryonic chain                                         | NM_008221        | -172.94     | -4061                                                      |
| Ch25h                | cholesterol 25-hydroxylase                                                      | NM_009890        | -21.22      | -4679                                                      |
| Hecw2                | HECT; C2 and WW domain containing E3 ubiquitin protein ligase 2                 | NM_172655        | -18.3       | -6410                                                      |
| Slc4a7               | solute carrier family 4; sodium bicarbonate cotransporter; member 7             | NM_001033270     | -13.27      | -117                                                       |
| Slc7a11              | solute carrier family 7 (cationic amino acid transporter; y+ system); member 11 | NM_011990        | -11.27      | -117                                                       |
| Pde4b                | phosphodiesterase 4B; cAMP specific                                             | NM_019840        | -7.09       | 142                                                        |
| Lipm                 | lipase; family member M                                                         | NM_023903        | -5.67       | -13613                                                     |
| Abca5                | ATP-binding cassette; sub-family A (ABC1); member 5                             | NM_147219        | -4.62       | 3156                                                       |
| A930038C07Rik        | RIKEN cDNA A930038C07 gene                                                      | NM_172399        | -4.51       | -137                                                       |

|                    |                                                                                                 |              |        |       |
|--------------------|-------------------------------------------------------------------------------------------------|--------------|--------|-------|
| Dse                | dermatan sulfate epimerase                                                                      | NM_172508    | -4.26  | -4146 |
| Lipk               | lipase; family member K                                                                         | NM_172837    | -4.21  | -117  |
| Slc15a2            | solute carrier family 15 (H+/peptide transporter); member 2                                     | NM_021301    | -4.04  | -353  |
| Adss               | adenylosuccinate synthetase; non muscle                                                         | NM_007422    | -2.75  | -1712 |
| Hebp2              | heme binding protein 2                                                                          | NM_019487    | -2.67  | -673  |
| Fut9               | fucosyltransferase 9                                                                            | NM_010243    | -2.61  | -7531 |
| Neu3               | neuraminidase 3                                                                                 | NM_016720    | -2.6   | -117  |
| Hdhd1a             | haloacid dehalogenase-like hydrolase domain containing 1A                                       | NM_026108    | -2.48  | -2715 |
| Rnf133             | ring finger protein 133                                                                         | NM_198251    | -2.34  | -749  |
| Esd                | esterase D/formylglutathione hydrolase                                                          | NM_016903    | -2.2   | -117  |
| Has1               | hyaluronan synthase1                                                                            | NM_008215    | -2.15  | -117  |
| Mast4              | microtubule associated serine/threonine kinase family member 4                                  | AK090136     | -2.01  | 1246  |
| Lnpep              | leucyl/cystinyl aminopeptidase                                                                  | NM_172827    | -1.93  | -4549 |
| Hba-a1             | hemoglobin alpha; adult chain 1                                                                 | NM_008218    | -1.91  | -4127 |
| Agpat5             | 1-acylglycerol-3-phosphate O-acyltransferase 5 (lysophosphatidic acid acyltransferase; epsilon) | NM_026792    | -1.83  | -6778 |
| Parp8              | poly (ADP-ribose) polymerase family; member 8                                                   | NM_001081009 | -1.83  | -2834 |
| Vat1               | vesicle amine transport protein 1 homolog (T californica)                                       | NM_012037    | -1.83  | 1046  |
| Lamp3              | lysosomal-associated membrane protein 3                                                         | NM_177356    | -1.8   | -6370 |
| <b>Upregulated</b> |                                                                                                 |              |        |       |
| Acox2              | acyl-Coenzyme A oxidase 2; branched chain                                                       | NM_053115    | 117.3  | -117  |
| Cyp2c29            | cytochrome P450; family 2; subfamily c; polypeptide 29                                          | NM_007815    | 103.33 | -8500 |
| Chi3l3             | chitinase 3-like 3                                                                              | NM_009892    | 103.33 | -547  |
| Acsm1              | acyl-CoA synthetase medium-chain family member 1                                                | NM_054094    | 62.5   | -1303 |
| Reg3g              | regenerating islet-derived 3 gamma                                                              | NM_011260    | 58.45  | -117  |
| Gc                 | group specific component                                                                        | NM_008096    | 50.83  | -1097 |
| Akr1c6             | aldo-keto reductase family 1; member C6                                                         | NM_030611    | 45.63  | -4900 |
| Slc10a1            | solute carrier family 10 (sodium/bile acid cotransporter family); member 1                      | NM_011387    | 42.05  | -117  |
| Aldob              | aldolase B; fructose-bisphosphate                                                               | NM_144903    | 38.24  | 3690  |
| Nrsn1              | neurensin 1                                                                                     | NM_009513    | 37.61  | -337  |

|               |                                                                                       |                    |       |        |
|---------------|---------------------------------------------------------------------------------------|--------------------|-------|--------|
| Gsta3         | glutathione S-transferase; alpha 3                                                    | NM_001077353       | 37.32 | -3971  |
| Car1          | carbonic anhydrase 1                                                                  | NM_009799          | 36.34 | -2202  |
| Gulo          | gulonolactone (L-) oxidase                                                            | NM_178747          | 34.9  | -1205  |
| Cyp2c70       | cytochrome P450; family 2; subfamily c; polypeptide 70                                | NM_145499          | 34.21 | 471    |
| Cyp3a16       | cytochrome P450; family 3; subfamily a; polypeptide 16                                | NM_007820          | 34.12 | -2272  |
| Chi3l4        | chitinase 3-like 4                                                                    | NM_145126          | 32.66 | -547   |
| Otor          | Otoraplin                                                                             | NM_020595          | 30.92 | -2493  |
| Cyp1b1        | cytochrome P450; family 1; subfamily b; polypeptide 1                                 | NM_009994          | 30.75 | -1843  |
| Cyp2e1        | cytochrome P450; family 2; subfamily e; polypeptide 1                                 | NM_021282          | 30.2  | 479    |
| Slc9a2        | solute carrier family 9 (sodium/hydrogen exchanger); member 2                         | AK077026           | 29.79 | -13136 |
| Bbox1         | butyrobetaine (gamma); 2-oxoglutarate dioxygenase 1 (gamma-butyrobetaine hydroxylase) | NM_130452          | 24.99 | 749    |
| Gucy1b3       | guanylate cyclase 1; soluble; beta 3                                                  | NM_017469          | 24.55 | -117   |
| Fmo5          | flavin containing monooxygenase 5                                                     | NM_010232          | 24.35 | -501   |
| Sult1d1       | sulfotransferase family 1D; member 1                                                  | NM_016771          | 21.1  | -238   |
| Lctf          | lactase-like                                                                          | NM_145835          | 19.72 | 2219   |
| Cp            | Ceruloplasmin                                                                         | NM_007752          | 18.1  | -3046  |
| Dpysl4        | dihydropyrimidinase-like 4                                                            | NM_011993          | 17.04 | 1975   |
| Gucy1a3       | guanylate cyclase 1; soluble; alpha 3                                                 | NM_021896          | 16.97 | -1427  |
| Magel2        | melanoma antigen; family L; 2                                                         | AK086725           | 15.3  | -117   |
| Clec5a        | C-type lectin domain family 5; member a                                               | NM_021364          | 14.83 | -117   |
| Trdn          | Triadin                                                                               | ENSMUST00000050626 | 14.5  | 3124   |
| Necab1        | N-terminal EF-hand calcium binding protein 1                                          | NM_178617          | 14.1  | 447    |
| 6430573F11Rik | RIKEN cDNA 6430573F11 gene                                                            | NM_176952          | 14.09 | -36090 |
| Chia          | chitinase; acidic                                                                     | NM_023186          | 12.68 | -4728  |
| Olfm3         | olfactomedin 3                                                                        | NM_153157          | 12.39 | -3697  |
| Abat          | 4-aminobutyrate aminotransferase                                                      | AK083062           | 11.75 | -1291  |
| Wscd1         | WSC domain containing 1                                                               | NM_177618          | 11.68 | -5824  |
| Slc40a1       | solute carrier family 40 (iron-regulated transporter); member 1                       | NM_016917          | 11.03 | -117   |
| Hpgd          | hydroxyprostaglandin dehydrogenase 15 (NAD)                                           | NM_008278          | 10.37 | 14250  |
| Lipf          | lipase; gastric                                                                       | NM_026334          | 9.89  | -3183  |
| St8sia3       | ST8 alpha-N-acetyl-neuraminide alpha-2;8-                                             | NM_009182          | 8.67  | -2528  |

|         |                                                                                    |                    |      |       |
|---------|------------------------------------------------------------------------------------|--------------------|------|-------|
|         | sialyltransferase 3                                                                |                    |      |       |
| Aadac   | arylacetamide deacetylase (esterase)                                               | NM_023383          | 8.65 | -3791 |
| Sult1c2 | sulfotransferase family; cytosolic; 1C; member 2                                   | NM_026935          | 8.39 | -3611 |
| Fmo1    | flavin containing monooxygenase 1                                                  | AK034946           | 8.33 | -5446 |
| Pik3c2g | phosphatidylinositol 3-kinase; C2 domain containing; gamma polypeptide             | NM_207683          | 7.43 | 340   |
| Kctd8   | potassium channel tetramerisation domain containing 8                              | NM_175519          | 6.79 | -117  |
| Kel     | Kell blood group                                                                   | NM_032540          | 6.75 | 771   |
| Cyp4x1  | cytochrome P450; family 4; subfamily x; polypeptide 1                              | AK038526           | 6.5  | 447   |
| Arsb    | arylsulfatase B                                                                    | NM_009712          | 6.47 | -3651 |
| Ampd1   | adenosine monophosphate deaminase 1                                                | NM_001033303       | 6.45 | -7318 |
| Hyal5   | hyaluronoglycosaminidase 5                                                         | NM_028957          | 6.3  | -4031 |
| Chodl   | Chondrolectin                                                                      | NM_139134          | 6.08 | 3343  |
| Kynu    | kynureninase (L-kynurenine hydrolase)                                              | NM_027552          | 5.77 | -6005 |
| Aldh1a1 | aldehyde dehydrogenase family 1; subfamily A1                                      | NM_013467          | 5.67 | -117  |
| Plce1   | phospholipase C; epsilon 1                                                         | NM_019588          | 5.49 | -117  |
| Sulf1   | sulfatase 1                                                                        | NM_172294          | 5.47 | -4622 |
| Alox5   | arachidonate 5-lipoxygenase                                                        | NM_009662          | 5.2  | 2170  |
| Sucnr1  | succinate receptor 1                                                               | NM_032400          | 5.01 | -3791 |
| Dpyd    | dihydropyrimidine dehydrogenase                                                    | NM_170778          | 5    | -3904 |
| St8sia5 | ST8 alpha-N-acetyl-neuraminide alpha-2;8-sialyltransferase 5                       | NM_153124          | 4.87 | -5750 |
| Has2    | hyaluronan synthase 2                                                              | NM_008216          | 4.79 | -2619 |
| Fabp7   | fatty acid binding protein 7; brain                                                | NM_021272          | 4.74 | -3103 |
| Pcp4    | Purkinje cell protein 4                                                            | NM_008791          | 4.67 | -716  |
| Cyp2d22 | cytochrome P450; family 2; subfamily d; polypeptide 22                             | NM_019823          | 4.6  | -117  |
| Hs3st1  | heparan sulfate (glucosamine) 3-O-sulfotransferase 1                               | NM_010474          | 4.48 | -3677 |
| Plscr2  | phospholipid scramblase 2                                                          | NM_008880          | 4.47 | -117  |
| G6pc2   | glucose-6-phosphatase; catalytic; 2                                                | NM_021331          | 4.37 | 2835  |
| Galnt5  | UDP-N-acetyl-alpha-D-galactosamine:polypeptide N-acetylgalactosaminyltransferase 5 | ENSMUST00000028171 | 4.14 | 4175  |
| Dhrs7c  | dehydrogenase/reductase (SDR family) member 7C                                     | AK003267           | 3.94 | -5574 |
| Aldh1a2 | aldehyde dehydrogenase family 1; subfamily A2                                      | NM_009022          | 3.94 | -4295 |
| Mgll    | monoglyceride lipase                                                               | NM_011844          | 3.65 | -22   |



|               |                                                                                       |              |      |        |
|---------------|---------------------------------------------------------------------------------------|--------------|------|--------|
| Mamdc2        | MAM domain containing 2                                                               | NM_174857    | 3.57 | 1013   |
| Galnt13       | UDP-N-acetyl-alpha-D-galactosamine:polypeptide N-acetylgalactosaminyltransferase 13   | NM_173030    | 3.55 | -1791  |
| Slc43a1       | solute carrier family 43; member 1                                                    | NM_001081349 | 3.47 | -3460  |
| 0610007P08Rik | RIKEN cDNA 0610007P08 gene                                                            | NM_001013608 | 3.4  | -4619  |
| Pcca          | propionyl-Coenzyme A carboxylase; alpha polypeptide                                   | NM_144844    | 3.16 | -117   |
| Sardh         | sarcosine dehydrogenase                                                               | NM_138665    | 3.14 | -3906  |
| Asf1b         | ASF1 anti-silencing function 1 homolog B (S. cerevisiae)                              | NM_024184    | 3    | 2861   |
| Ugt2a3        | UDP glucuronosyltransferase 2 family; polypeptide A3                                  | NM_028094    | 2.98 | -2593  |
| Mlana         | melan-A                                                                               | CF723683     | 2.83 | -31957 |
| Adh1          | alcohol dehydrogenase 1 (class I)                                                     | NM_007409    | 2.74 | -4883  |
| Pomt2         | protein-O-mannosyltransferase 2                                                       | NM_153415    | 2.7  | -117   |
| Mdh1b         | malate dehydrogenase 1B; NAD (soluble)                                                | NM_029696    | 2.61 | -2979  |
| Large         | like-glycosyltransferase                                                              | NM_010687    | 2.6  | -492   |
| Dlat          | dihydrolipoamide S-acetyltransferase (E2 component of pyruvate dehydrogenase complex) | NM_145614    | 2.59 | -117   |
| Dclk3         | doublecortin-like kinase 3                                                            | NM_172928    | 2.53 | -2640  |
| Clca3         | chloride channel calcium activated 3                                                  | NM_017474    | 2.52 | 3968   |
| Steap4        | STEAP family member 4                                                                 | NM_054098    | 2.45 | 597    |
| Snx7          | sorting nexin 7                                                                       | NM_029655    | 2.42 | -7968  |
| Ppt1          | palmitoyl-protein thioesterase 1                                                      | NM_008917    | 2.41 | 2431   |
| Slc12a6       | solute carrier family 12; member 6                                                    | NM_133649    | 2.36 | -1603  |
| Hck           | hemopoietic cell kinase                                                               | NM_010407    | 2.35 | -1240  |
| Neu2          | neuraminidase 2                                                                       | NM_015750    | 2.34 | 25441  |
| Fh1           | fumarate hydratase 1                                                                  | NM_010209    | 2.33 | 3587   |
| Aldh6a1       | aldehyde dehydrogenase family 6; subfamily A1                                         | NM_134042    | 2.32 | -117   |
| Oat           | ornithine aminotransferase                                                            | NM_016978    | 2.3  | -3471  |
| Hsd17b11      | hydroxysteroid (17-beta) dehydrogenase 11                                             | NM_053262    | 2.3  | 4811   |
| Phactr1       | phosphatase and actin regulator 1                                                     | NM_001005748 | 2.27 | -362   |
| Ndufb7        | NADH dehydrogenase (ubiquinone) 1 beta subcomplex; 7                                  | NM_025843    | 2.15 | -5752  |
| Cyp2r1        | cytochrome P450; family 2; subfamily r; polypeptide 1                                 | NM_177382    | 2.11 | 320    |
| Cryl1         | crystallin; lambda 1                                                                  | NM_030004    | 2.09 | -4204  |
| Ddc           | dopa decarboxylase                                                                    | NM_016672    | 2.04 | 130233 |

|          |                                                                        |              |      |       |
|----------|------------------------------------------------------------------------|--------------|------|-------|
| St8sia4  | ST8 alpha-N-acetyl-neuraminide alpha-2;8-sialyltransferase 4           | NM_009183    | 2.02 | -3676 |
| Enox1    | ecto-NOX disulfide-thiol exchanger 1                                   | NM_172813    | 2.01 | -117  |
| Mtmr7    | myotubularin related protein 7                                         | NM_001040699 | 1.98 | -3341 |
| Itih5    | inter-alpha (globulin) inhibitor H5                                    | NM_172471    | 1.94 | -5114 |
| Enpp2    | ectonucleotide pyrophosphatase/phosphodiesterase 2                     | NM_015744    | 1.94 | -117  |
| Dgkk     | diacylglycerol kinase kappa                                            | AK081332     | 1.94 | 1336  |
| Pdia5    | protein disulfide isomerase associated 5                               | NM_028295    | 1.82 | -7910 |
| Loxl3    | lysyl oxidase-like 3                                                   | NM_013586    | 1.82 | -127  |
| Hsd17b4  | hydroxysteroid (17-beta) dehydrogenase 4                               | NM_008292    | 1.76 | -7019 |
| Retnlg   | resistin like gamma                                                    | NM_181596    | 1.75 | 1424  |
| Gnb3     | guanine nucleotide binding protein (G protein); beta 3                 | NM_013530    | 1.73 | -1904 |
| Slc16a12 | solute carrier family 16 (monocarboxylic acid transporters); member 12 | NM_172838    | 1.7  | -117  |

#### Proteolysis

| Gene symbol          | Gene full name                                                                     | Accession Number | Fold change | ChIP on chip: distance to TSS (nearest peak) (bp) |
|----------------------|------------------------------------------------------------------------------------|------------------|-------------|---------------------------------------------------|
| <b>Downregulated</b> |                                                                                    |                  |             |                                                   |
| Mme                  | membrane metallo endopeptidase                                                     | NM_008604        | -18.44      | -15628                                            |
| Serpinb6c            | serine (or cysteine) peptidase inhibitor; clade B; member 6c                       | AF425084         | -10.52      | -3258                                             |
| Serpinb11            | serine (or cysteine) peptidase inhibitor; clade B (ovalbumin); member 11           | NM_025867        | -5.25       | 1058                                              |
| Cpa6                 | carboxypeptidase A6                                                                | NM_177834        | -3.85       | -7196                                             |
| 4930486L24Rik        | RIKEN cDNA 4930486L24 gene                                                         | NM_178098        | -3.83       | 1837                                              |
| Serpinb9             | serine (or cysteine) peptidase inhibitor; clade B; member 9                        | NM_009256        | -3.48       | 3224                                              |
| Clec4d               | C-type lectin domain family 4; member d                                            | NM_010819        | -3.41       | -1683                                             |
| Adam29               | a disintegrin and metallopeptidase domain 29                                       | NM_175939        | -2.8        | -1798                                             |
| Rab5a                | RAB5A; member RAS oncogene family                                                  | NM_025887        | -2.73       | -4645                                             |
| Adam32               | a disintegrin and metallopeptidase domain 32                                       | NM_153397        | -2.51       | -2776                                             |
| Abl2                 | v-abl Abelson murine leukemia viral oncogene homolog 2 (arg; Abelson-related gene) | U40827           | -2.17       | -1774                                             |
| Serpinb13            | serine (or cysteine) peptidase inhibitor; clade B                                  | NM_172852        | -1.93       | 31587                                             |

|                    |                                                                                                    |                    |        |        |
|--------------------|----------------------------------------------------------------------------------------------------|--------------------|--------|--------|
|                    | (ovalbumin); member 13                                                                             |                    |        |        |
| <b>Upregulated</b> |                                                                                                    |                    |        |        |
| Serpina3k          | serine (or cysteine) peptidase inhibitor; clade A; member 3K                                       | ENSMUST00000043058 | 355.37 | -5407  |
| Proz               | protein Z; vitamin K-dependent plasma glycoprotein                                                 | AK005011           | 233.94 | -3965  |
| Ms4a3              | membrane-spanning 4-domains; subfamily A; member 3                                                 | NM_133246          | 33.25  | -117   |
| Ms4a6b             | membrane-spanning 4-domains; subfamily A; member 6B                                                | NM_027209          | 32.11  | -7265  |
| Klkb1              | kallikrein B; plasma 1                                                                             | NM_008455          | 30.33  | -6906  |
| Spink3             | serine peptidase inhibitor; Kazal type 3                                                           | NM_009258          | 27.94  | -3939  |
| Fpr2               | formyl peptide receptor 2                                                                          | NM_008039          | 23.71  | -3002  |
| Ccl12              | chemokine (C-C motif) ligand 12                                                                    | NM_011331          | 22.05  | -585   |
| Angptl3            | angiopoietin-like 3                                                                                | NM_013913          | 16.91  | -1995  |
| Arhgap20           | Rho GTPase activating protein 20                                                                   | NM_175535          | 14.24  | -24498 |
| Serpini2           | serine (or cysteine) peptidase inhibitor; clade I; member 2                                        | NM_026460          | 13.73  | 45020  |
| Odz3               | odd Oz/ten-m homolog 3 (Drosophila)                                                                | NM_011857          | 13.4   | -5364  |
| Ctsg               | cathepsin G                                                                                        | NM_007800          | 12.96  | -6902  |
| Htra3              | HtrA serine peptidase 3                                                                            | NM_030127          | 12.19  | -117   |
| Serpina10          | serine (or cysteine) peptidase inhibitor; clade A (alpha-1 antiproteinase; antitrypsin); member 10 | AK050552           | 10.86  | 5648   |
| Agtr1a             | angiotensin II receptor; type 1a                                                                   | NM_177322          | 8.16   | 2852   |
| Agtr2              | angiotensin II receptor; type 2                                                                    | NM_007429          | 7.61   | -1158  |
| Lpar4              | lysophosphatidic acid receptor 4                                                                   | NM_175271          | 6.77   | -3488  |
| Iigp1              | interferon inducible GTPase 1                                                                      | NM_021792          | 6.54   | -3132  |
| Ppbb               | pro-platelet basic protein                                                                         | NM_023785          | 6.3    | -6427  |
| Ceacam1            | carcinoembryonic antigen-related cell adhesion molecule 1                                          | NM_001039186       | 6.24   | -4739  |
| Lonrf2             | LON peptidase N-terminal domain and ring finger 2                                                  | AK013739           | 5.91   | -1805  |
| Dpp6               | dipeptidylpeptidase 6                                                                              | NM_010075          | 5.68   | -7106  |
| Tfpi2              | tissue factor pathway inhibitor 2                                                                  | NM_009364          | 5.52   | -1241  |
| Tspan12            | tetraspanin 12                                                                                     | NM_173007          | 5.2    | -1527  |
| Plcl2              | phospholipase C-like 2                                                                             | NM_013880          | 4.32   | -117   |

|          |                                                                                                               |           |      |       |
|----------|---------------------------------------------------------------------------------------------------------------|-----------|------|-------|
| Fabp4    | fatty acid binding protein 4; adipocyte                                                                       | NM_024406 | 4.18 | -5690 |
| Uchl1    | ubiquitin carboxy-terminal hydrolase L1                                                                       | NM_011670 | 3.96 | 28853 |
| Adamts12 | a disintegrin-like and metallopeptidase (reprolysin type) with thrombospondin type 1 motif; 12                | NM_175501 | 3.84 | -189  |
| Farp2    | FERM; RhoGEF and pleckstrin domain protein 2                                                                  | NM_145519 | 3.19 | -2355 |
| Adamts5  | a disintegrin-like and metallopeptidase (reprolysin type) with thrombospondin type 1 motif; 5 (aggrecanase-2) | NM_011782 | 3.18 | -117  |
| Tmeff2   | transmembrane protein with EGF-like/follistatin-like domains 2                                                | NM_019790 | 2.98 | -3773 |
| Tiam2    | T-cell lymphoma invasion and metastasis 2                                                                     | NM_011878 | 2.83 | -282  |
| Fbxw8    | F-box and WD-40 domain protein 8                                                                              | NM_172721 | 2.62 | 1874  |
| Serpinf1 | serine (or cysteine) peptidase inhibitor; clade F; member 1                                                   | NM_011340 | 2.48 | 3575  |
| Capn6    | calpain 6                                                                                                     | AK048028  | 1.97 | -4212 |
| Klk1b11  | kallikrein 1-related peptidase b11                                                                            | NM_010640 | 1.83 | 385   |

#### Signalling

| Gene symbol          | Gene full name                                                    | Accession Number | Fold change | ChIP on chip: distance to TSS (nearest peak) (bp) |
|----------------------|-------------------------------------------------------------------|------------------|-------------|---------------------------------------------------|
| <b>Downregulated</b> |                                                                   |                  |             |                                                   |
| Ccl2                 | chemokine (C-C motif) ligand 2                                    | NM_011333        | -34.39      | -585                                              |
| Rln1                 | relaxin 1                                                         | NM_011272        | -10.12      | -117                                              |
| Slc6a17              | solute carrier family 6 (neurotransmitter transporter); member 17 | NM_172271        | -9.85       | -6150                                             |
| Akt3                 | thymoma viral proto-oncogene 3                                    | NM_011785        | -8.87       | -117                                              |
| Clic5                | chloride intracellular channel 5                                  | NM_172621        | -7.67       | -7756                                             |
| Il22ra2              | interleukin 22 receptor; alpha 2                                  | NM_178258        | -7.66       | -1645                                             |
| Il1f5                | interleukin 1 family; member 5 (delta)                            | NM_019451        | -7.59       | -28                                               |
| Olf1226              | olfactory receptor 1226                                           | NM_146967        | -6.44       | -2178                                             |
| Uts2r                | urotensin 2 receptor                                              | NM_145440        | -4.96       | -3992                                             |
| Olf1691              | olfactory receptor 691                                            | NM_147061        | -4.59       | 2568                                              |
| Ifnab                | interferon alpha B                                                | BC116864         | -4.24       | -117                                              |
| Olf1155              | olfactory receptor 1155                                           | NM_146643        | -4.2        | -3545                                             |

|          |                                                        |           |       |        |
|----------|--------------------------------------------------------|-----------|-------|--------|
| Olfr1231 | olfactory receptor 1231                                | NM_146454 | -3.98 | -5932  |
| Il17re   | interleukin 17 receptor E                              | NM_145826 | -3.89 | 346    |
| Nebl     | Nebulette                                              | AK036214  | -3.86 | -6453  |
| Olfr898  | olfactory receptor 898                                 | NM_146871 | -3.66 | -858   |
| Olfr1351 | olfactory receptor 1351                                | NM_147040 | -3.59 | -117   |
| Olfr380  | olfactory receptor 380                                 | NM_147025 | -3.55 | -3449  |
| Olfr291  | olfactory receptor 291                                 | NM_146415 | -3.47 | 652    |
| Olfr1056 | olfactory receptor 1056                                | NM_147018 | -3.41 | -3210  |
| Tmc1     | transmembrane channel-like gene family 1               | AF417579  | -3.34 | -5474  |
| Klri2    | killer cell lectin-like receptor family I member 2     | NM_177155 | -3.3  | -2244  |
| Olfr183  | olfactory receptor 183                                 | NM_146485 | -3.29 | -5002  |
| Tmem35   | transmembrane protein 35                               | NM_026239 | -3.24 | -5664  |
| Olfr905  | olfactory receptor 905                                 | NM_146804 | -3.15 | -7848  |
| Igf2bp2  | insulin-like growth factor 2 mRNA binding protein 2    | NM_183029 | -3.04 | 114903 |
| Vamp1    | vesicle-associated membrane protein 1                  | NM_009496 | -3.02 | -1683  |
| Olfr23   | olfactory receptor 23                                  | NM_010970 | -2.98 | -1367  |
| Olfr1209 | olfactory receptor 1209                                | NM_146461 | -2.92 | -3444  |
| Olfr1294 | olfactory receptor 1294                                | NM_146885 | -2.9  | -117   |
| Olfr1467 | olfactory receptor 1467                                | NM_146691 | -2.89 | -442   |
| Glr2     | glycine receptor; alpha 2 subunit                      | NM_183427 | -2.85 | -174   |
| Slc26a3  | solute carrier family 26; member 3                     | AK035716  | -2.82 | -20826 |
| Olfr160  | olfactory receptor 160                                 | NM_030553 | -2.78 | -117   |
| Olfr821  | olfactory receptor 821                                 | NM_146776 | -2.72 | -1656  |
| Iqcb1    | IQ calmodulin-binding motif containing 1               | NM_177128 | -2.67 | -117   |
| Klrk1    | killer cell lectin-like receptor subfamily K; member 1 | AF054819  | -2.64 | -6772  |
| Nts      | Neurotensin                                            | NM_024435 | -2.62 | 1305   |
| Olfr665  | olfactory receptor 665                                 | NM_146814 | -2.55 | 513    |
| Olfr996  | olfactory receptor 996                                 | NM_146437 | -2.41 | -117   |
| Rxfp2    | relaxin/insulin-like family peptide receptor 2         | NM_080468 | -2.4  | -4523  |
| Olfr1133 | olfactory receptor 1133                                | NM_146351 | -2.28 | 255    |
| Olfr554  | olfactory receptor 554                                 | NM_146325 | -2.27 | 1380   |
| Olfr348  | olfactory receptor 348                                 | NM_146944 | -2.25 | 707    |
| Olfr689  | olfactory receptor 689                                 | NM_146750 | -2.25 | 2415   |

|          |                                                                                             |              |       |       |
|----------|---------------------------------------------------------------------------------------------|--------------|-------|-------|
| Teddm1   | transmembrane epididymal protein 1                                                          | NM_178244    | -2.25 | 9185  |
| Ifna12   | interferon alpha 12                                                                         | NM_177361    | -2.24 | -117  |
| Olfr466  | olfactory receptor 466                                                                      | NM_146819    | -2.23 | -1158 |
| Cpne8    | copine VIII                                                                                 | NM_025815    | -2.21 | -7622 |
| Olfr980  | olfactory receptor 980                                                                      | NM_147106    | -2.21 | -6840 |
| Rxfp3    | relaxin family peptide receptor 3                                                           | NM_178717    | -2.2  | -1225 |
| Grem2    | gremlin 2 homolog; cysteine knot superfamily<br>(Xenopus laevis)                            | NM_011825    | -2.19 | -117  |
| Bdnf     | brain derived neurotrophic factor                                                           | NM_007540    | -2.15 | -2462 |
| Olfr985  | olfactory receptor 985                                                                      | NM_146855    | -2.15 | -117  |
| Olfr1278 | olfactory receptor 1278                                                                     | NM_146394    | -2.14 | -933  |
| Olfr678  | olfactory receptor 678                                                                      | NM_146758    | -2.11 | -752  |
| Gpr156   | G protein-coupled receptor 156                                                              | NM_153394    | -2.1  | -1353 |
| Gngt1    | guanine nucleotide binding protein (G protein);<br>gamma transducing activity polypeptide 1 | NM_010314    | -2.09 | 1642  |
| Olfr1388 | olfactory receptor 1388                                                                     | NM_146467    | -2.07 | -2925 |
| Olfr488  | olfactory receptor 488                                                                      | NM_146732    | -2.07 | -1044 |
| Olfr99   | olfactory receptor 99                                                                       | NM_146515    | -2.05 | -2698 |
| Pde7a    | phosphodiesterase 7A                                                                        | NM_008802    | -2.04 | -547  |
| Olfr552  | olfactory receptor 552                                                                      | NM_147102    | -2.03 | 1380  |
| Slc6a11  | solute carrier family 6 (neurotransmitter transporter;<br>GABA); member 11                  | NM_172890    | -2.02 | 345   |
| Tacr3    | tachykinin receptor 3                                                                       | NM_021382    | -1.97 | -6389 |
| Il31     | interleukin 31                                                                              | AK005939     | -1.97 | -117  |
| Htr4     | 5 hydroxytryptamine (serotonin) receptor 4                                                  | NM_008313    | -1.96 | -2528 |
| Nrg3     | neuregulin 3                                                                                | NM_008734    | -1.96 | -117  |
| Procr    | protein C receptor; endothelial                                                             | NM_011171    | -1.95 | -654  |
| Ptger4   | prostaglandin E receptor 4 (subtype EP4)                                                    | NM_008965    | -1.94 | -1002 |
| Olfr782  | olfactory receptor 782                                                                      | NM_001011797 | -1.9  | -5514 |
| Olfr1234 | olfactory receptor 1234                                                                     | NM_146973    | -1.9  | -1535 |
| Olfr1250 | olfactory receptor 1250                                                                     | NM_146965    | -1.87 | -3163 |
| Olfr165  | olfactory receptor 165                                                                      | NM_146466    | -1.83 | -5065 |
| Olfr1019 | olfactory receptor 1019                                                                     | NM_147015    | -1.83 | -3135 |
| Wnt6     | wingless-related MMTV integration site 6                                                    | M89800       | -1.78 | -7973 |

|                    |                                                                                           |              |       |        |
|--------------------|-------------------------------------------------------------------------------------------|--------------|-------|--------|
| Ralgds             | ral guanine nucleotide dissociation stimulator                                            | NM_009058    | -1.78 | -117   |
| Olf1290            | olfactory receptor 1290                                                                   | NM_146262    | -1.75 | -117   |
| Olf124             | olfactory receptor 124                                                                    | NM_147062    | -1.75 | 150531 |
| Olf145             | olfactory receptor 45                                                                     | NM_146963    | -1.74 | -1784  |
| <b>Upregulated</b> |                                                                                           |              |       |        |
| Scg3               | secretogranin III                                                                         | NM_009130    | 64.14 | -117   |
| Lect2              | leukocyte cell-derived chemotaxin 2                                                       | NM_010702    | 52.07 | -2845  |
| Calb1              | calbindin 1                                                                               | NM_009788    | 49.71 | -2534  |
| Klb                | klotho beta                                                                               | NM_031180    | 47.62 | 352    |
| Syt1               | synaptotagmin I                                                                           | NM_009306    | 46.55 | 2130   |
| Clca6              | chloride channel calcium activated 6                                                      | NM_207208    | 42.65 | 69627  |
| Mstn               | Myostatin                                                                                 | NM_010834    | 33.29 | 2524   |
| Chgb               | chromogranin B                                                                            | NM_007694    | 28.32 | 986    |
| Anxa10             | annexin A10                                                                               | NM_011922    | 26.24 | 2131   |
| Arpp21             | cyclic AMP-regulated phosphoprotein; 21                                                   | AK041940     | 24.72 | -7854  |
| Fstl5              | follicle-stimulating-like 5                                                               | NM_178673    | 24.36 | -1426  |
| Pdgfd              | platelet-derived growth factor; D polypeptide                                             | NM_027924    | 22.42 | 1582   |
| Gpr65              | G-protein coupled receptor 65                                                             | NM_008152    | 21.07 | -117   |
| Ptprr              | protein tyrosine phosphatase; receptor type; R                                            | NM_011217    | 21.01 | -3750  |
| Snap25             | synaptosomal-associated protein 25                                                        | M22012       | 19.9  | 849    |
| Kcnn2              | potassium intermediate/small conductance calcium-activated channel; subfamily N; member 2 | NM_080465    | 17.85 | -3491  |
| Slc5a11            | solute carrier family 5 (sodium/glucose cotransporter); member 11                         | NM_146198    | 17.62 | -3280  |
| Ttc30a1            | tetratricopeptide repeat domain 30A1                                                      | NM_030188    | 15.94 | -7468  |
| Kcnj10             | potassium inwardly-rectifying channel; subfamily J; member 10                             | NM_001039484 | 15.63 | -4625  |
| Dlg2               | discs, large homolog 2 (Drosophila)                                                       | NM_011807    | 15.53 | -117   |
| Slc12a1            | solute carrier family 12; member 1                                                        | U61381       | 15.43 | -2139  |
| Erc2               | ELKS/RAB6-interacting/CAST family member 2                                                | NM_177814    | 15.3  | -821   |
| Rab9b              | RAB9B; member RAS oncogene family                                                         | NM_176971    | 13.86 | -2431  |
| Epha3              | Eph receptor A3                                                                           | NM_010140    | 10.77 | -3123  |
| Scg2               | secretogranin II                                                                          | NM_009129    | 10.52 | 23937  |

|          |                                                                                        |              |       |       |
|----------|----------------------------------------------------------------------------------------|--------------|-------|-------|
| Rgs8     | regulator of G-protein signalling 8                                                    | NM_026380    | 10.29 | -1700 |
| Pclo     | piccolo (presynaptic cytomatrix protein)                                               | NM_001110796 | 10.04 | -4260 |
| Gabbr1   | gamma-aminobutyric acid (GABA) A receptor; subunit beta 1                              | NM_008069    | 10.03 | 2971  |
| Acvr1c   | activin A receptor; type IC                                                            | NM_001033369 | 9.7   | -2341 |
| Trem14   | triggering receptor expressed on myeloid cells-like 4                                  | NM_172623    | 9.41  | 2551  |
| Gpr85    | G protein-coupled receptor 85                                                          | NM_145066    | 9.11  | -1904 |
| Gbp6     | guanylate binding protein 6                                                            | NM_145545    | 9.04  | -4883 |
| Ppp1r1c  | protein phosphatase 1; regulatory (inhibitor) subunit 1C                               | AK051449     | 8.82  | -3460 |
| P2ry13   | purinergic receptor P2Y; G-protein coupled 13                                          | NM_028808    | 8.19  | -1371 |
| Ghrl     | Ghrelin                                                                                | NM_021488    | 7.99  | -1904 |
| Gpr88    | G-protein coupled receptor 88                                                          | NM_022427    | 6.75  | -2466 |
| Csmd3    | CUB and Sushi multiple domains 3                                                       | NM_001081391 | 6.71  | -117  |
| Calcr    | calcitonin receptor                                                                    | NM_007588    | 6.61  | -7077 |
| Elmo1    | engulfment and cell motility 1; ced-12 homolog (C. elegans)                            | NM_080288    | 6.34  | -5298 |
| Rassf6   | Ras association (RalGDS/AF-6) domain family member 6                                   | NM_028478    | 6.26  | -2461 |
| Rttm     | Rotatin                                                                                | NM_175542    | 5.61  | -3014 |
| Sema3d   | sema domain; immunoglobulin domain (Ig); short basic domain; secreted; (semaphorin) 3D | NM_028882    | 5.49  | 96378 |
| C1qtnf9  | C1q and tumor necrosis factor related protein 9                                        | NM_183175    | 5.47  | -117  |
| Olfir744 | olfactory receptor 744                                                                 | NM_001011738 | 5.37  | -4251 |
| Ins2     | insulin II                                                                             | NM_008387    | 5.31  | 3053  |
| Csf3r    | colony stimulating factor 3 receptor (granulocyte)                                     | NM_007782    | 5.12  | 1031  |
| Camk2b   | calcium/calmodulin-dependent protein kinase II; beta                                   | NM_007595    | 5.03  | -6752 |
| Opn5     | opsin 5                                                                                | NM_181753    | 4.97  | 3937  |
| Avpr1a   | arginine vasopressin receptor 1A                                                       | NM_016847    | 4.92  | -1129 |
| Khdrbs2  | KH domain containing; RNA binding; signal transduction associated 2                    | NM_133235    | 4.81  | -743  |
| Epha5    | Eph receptor A5                                                                        | NM_007937    | 4.78  | -3281 |
| Scn3b    | sodium channel; voltage-gated; type III; beta                                          | NM_153522    | 4.74  | 71212 |
| Ihh      | Indian hedgehog                                                                        | NM_010544    | 4.53  | -2379 |
| Npsr1    | neuropeptide S receptor 1                                                              | NM_175678    | 4.34  | -4153 |



|               |                                                                    |                    |      |        |
|---------------|--------------------------------------------------------------------|--------------------|------|--------|
| Rgs7bp        | regulator of G-protein signalling 7 binding protein                | NM_029879          | 4.25 | 1093   |
| Gabrg2        | gamma-aminobutyric acid (GABA) A receptor; subunit gamma 2         | NM_008073          | 4.21 | -7904  |
| 4632428N05Rik | RIKEN cDNA 4632428N05 gene                                         | NM_028732          | 3.95 | -4008  |
| Adora3        | adenosine A3 receptor                                              | AK013534           | 3.9  | -117   |
| Gpr37         | G protein-coupled receptor 37                                      | ENSMUST00000054867 | 3.87 | -8171  |
| Gabra2        | gamma-aminobutyric acid (GABA) A receptor; subunit alpha 2         | NM_008066          | 3.84 | -117   |
| Mrgprb2       | MAS-related GPR; member B2                                         | NM_175531          | 3.78 | -21570 |
| Prkg1         | protein kinase; cGMP-dependent; type I                             | NM_011160          | 3.63 | -117   |
| Gabrg1        | gamma-aminobutyric acid (GABA) A receptor; subunit gamma 1         | NM_010252          | 3.58 | -117   |
| Slc6a20a      | solute carrier family 6 (neurotransmitter transporter); member 20A | AK080979           | 3.57 | -117   |
| Il1f6         | interleukin 1 family; member 6                                     | NM_019450          | 3.54 | -1604  |
| Ifi47         | interferon gamma inducible protein 47                              | NM_008330          | 3.52 | -690   |
| Prkcq         | protein kinase C; theta                                            | NM_008859          | 3.51 | -7749  |
| Olf128        | olfactory receptor 128                                             | NM_206816          | 3.4  | -4320  |
| Hhip          | Hedgehog-interacting protein                                       | NM_020259          | 3.28 | -492   |
| Arhgap24      | Rho GTPase activating protein 24                                   | NM_146161          | 3.27 | 4505   |
| Sh2d1b1       | SH2 domain protein 1B1                                             | NM_012009          | 3.08 | -1687  |
| Grm3          | glutamate receptor; metabotropic 3                                 | NM_181850          | 3.05 | -4427  |
| Syp           | Synaptophysin                                                      | NM_009305          | 3.01 | 4323   |
| Adcy2         | adenylate cyclase 2                                                | NM_153534          | 2.96 | -117   |
| Syt4          | synaptotagmin IV                                                   | NM_009308          | 2.82 | -117   |
| Synpr         | Synaptoporin                                                       | NM_028052          | 2.81 | 2200   |
| Gpr135        | G protein-coupled receptor 135                                     | NM_181752          | 2.8  | -6001  |
| Ms4a6c        | membrane-spanning 4-domains; subfamily A; member 6C                | NM_028595          | 2.8  | -38    |
| Dact1         | dapper homolog 1; antagonist of beta-catenin (xenopus)             | AK077691           | 2.79 | -1923  |
| Slitrk1       | SLIT and NTRK-like family; member 1                                | NM_199065          | 2.77 | -4597  |
| Olf1134       | olfactory receptor 1134                                            | NM_147030          | 2.75 | 255    |
| Ifi205        | interferon activated gene 205                                      | AK036386           | 2.7  | -117   |
| Taar9         | trace amine-associated receptor 9                                  | NM_001010831       | 2.65 | -7491  |

|               |                                                                |              |      |       |
|---------------|----------------------------------------------------------------|--------------|------|-------|
| Tmem100       | transmembrane protein 100                                      | NM_026433    | 2.65 | -1153 |
| Rgs17         | regulator of G-protein signalling 17                           | NM_019958    | 2.58 | -117  |
| A630033H20Rik | RIKEN cDNA A630033H20 gene                                     | NM_175442    | 2.56 | 1730  |
| Gbp2          | guanylate binding protein 2                                    | NM_010260    | 2.51 | -117  |
| Olfr1352      | olfactory receptor 1352                                        | NM_147071    | 2.45 | -2732 |
| Chrd          | Chordin                                                        | NM_009893    | 2.4  | -117  |
| Cabp2         | calcium binding protein 2                                      | NM_013878    | 2.38 | -6860 |
| Olfr1123      | olfactory receptor 1123                                        | NM_146350    | 2.38 | -3405 |
| Rims1         | regulating synaptic membrane exocytosis 1                      | NM_001012625 | 2.32 | -1594 |
| Olfr1245      | olfactory receptor 1245                                        | NM_146788    | 2.3  | -670  |
| Olfr508       | olfactory receptor 508                                         | NM_146773    | 2.27 | 770   |
| Umodl1        | uromodulin-like 1                                              | NM_177465    | 2.22 | -3890 |
| Olfr390       | olfactory receptor 390                                         | NM_146347    | 2.21 | 10333 |
| Sln           | Sarcosin                                                       | AK009809     | 2.13 | 2626  |
| Slco1a6       | solute carrier organic anion transporter family;<br>member 1a6 | NM_023718    | 2.12 | 1613  |
| Ranbp17       | RAN binding protein 17                                         | NM_023146    | 2.11 | -2599 |
| Olfr609       | olfactory receptor 609                                         | NM_147082    | 2.1  | -4400 |
| Plscr1        | phospholipid scramblase 1                                      | NM_011636    | 2.07 | -3767 |
| Olfr1255      | olfactory receptor 1255                                        | NM_146977    | 2.05 | -2462 |
| Bpil3         | bactericidal/permeability-increasing protein-like 3            | NM_199303    | 2.04 | -654  |
| Cd209e        | CD209e antigen                                                 | NM_130905    | 1.87 | 6578  |
| Tmtc4         | transmembrane and tetratricopeptide repeat<br>containing 4     | NM_028651    | 1.86 | 637   |
| Olfr541       | olfactory receptor 541                                         | NM_146962    | 1.82 | -6312 |
| Gpr34         | G protein-coupled receptor 34                                  | NM_011823    | 1.81 | -3833 |
| Ccl11         | chemokine (C-C motif) ligand 11                                | NM_011330    | 1.8  | -585  |
| Olfr642       | olfactory receptor 642                                         | NM_146329    | 1.78 | -475  |
| Olfr895       | olfactory receptor 895                                         | NM_146875    | 1.77 | -117  |
| Syt4          | synaptotagmin-like 4                                           | NM_013757    | 1.76 | -775  |
| Olfr295       | olfactory receptor 295                                         | NM_146851    | 1.7  | -4470 |

**Transcription**

| Gene symbol | Gene full name | Accession Number | Fold change | ChIP on chip: distance to |
|-------------|----------------|------------------|-------------|---------------------------|
|-------------|----------------|------------------|-------------|---------------------------|

|                      |                                                                            |              |        | TSS (nearest peak) (bp) |
|----------------------|----------------------------------------------------------------------------|--------------|--------|-------------------------|
| <b>Downregulated</b> |                                                                            |              |        |                         |
| Fos                  | FBJ osteosarcoma oncogene                                                  | NM_010234    | -12.63 | 195                     |
| Egr2                 | early growth response 2                                                    | NM_010118    | -6.09  | -117                    |
| Rfx3                 | regulatory factor X; 3 (influences HLA class II expression)                | NM_011265    | -5.03  | -3978                   |
| Fgf1                 | fibroblast growth factor 1                                                 | NM_010197    | -4.01  | -117                    |
| Zfp330               | zinc finger protein 330                                                    | NM_145600    | -2.44  | -734                    |
| Neurod4              | neurogenic differentiation 4                                               | NM_007501    | -2.07  | -798                    |
| Erf                  | Ets2 repressor factor                                                      | NM_010155    | -2     | -4499                   |
| Zfp677               | zinc finger protein 677                                                    | NM_172486    | -1.99  | -3158                   |
| Prdm5                | PR domain containing 5                                                     | NM_027547    | -1.77  | -4447                   |
| <b>Upregulated</b>   |                                                                            |              |        |                         |
| Dmrt2                | doublesex and mab-3 related transcription factor 2                         | NM_145831    | 36     | -117                    |
| Lhx8                 | LIM homeobox protein 8                                                     | NM_010713    | 15.57  | -2399                   |
| Tcfec                | transcription factor EC                                                    | NM_031198    | 14.78  | -3855                   |
| Luzp2                | leucine zipper protein 2                                                   | NM_178705    | 14.72  | -7916                   |
| Neurod6              | neurogenic differentiation 6                                               | NM_009717    | 13.25  | -117                    |
| Lhx6                 | LIM homeobox protein 6                                                     | AJ000337     | 9.04   | -4545                   |
| Sox13                | SRY-box containing gene 13                                                 | NM_011439    | 8.52   | -6538                   |
| Maml2                | mastermind like 2 (Drosophila)                                             | XM_001481278 | 8.06   | -742                    |
| Gfi1b                | growth factor independent 1B                                               | NM_008114    | 7.6    | -7306                   |
| Lin28b               | lin-28 homolog B (C. elegans)                                              | AK044904     | 7.14   | -117                    |
| Lix1                 | limb expression 1 homolog (chicken)                                        | NM_025681    | 7.01   | -117                    |
| Fbxo40               | F-box protein 40                                                           | AK036684     | 4.52   | -353                    |
| Limch1               | LIM and calponin homology domains 1                                        | NM_001001980 | 4.09   | -2494                   |
| Myf6                 | myogenic factor 6                                                          | NM_008657    | 3.96   | -12192                  |
| Pparg                | peroxisome proliferator activated receptor gamma                           | NM_011146    | 3.9    | -117                    |
| Runx1t1              | runt-related transcription factor 1; translocated to; 1 (cyclin D-related) | NM_009822    | 3.53   | 4639                    |
| Zfp161               | zinc finger protein 161                                                    | NM_009547    | 3.51   | -8565                   |
| Mef2c                | myocyte enhancer factor 2C                                                 | NM_025282    | 3.1    | -80                     |
| Zfp58                | zinc finger protein 58                                                     | M28513       | 3.09   | -6801                   |

|        |                                                        |           |      |       |
|--------|--------------------------------------------------------|-----------|------|-------|
| Zfp595 | zinc finger protein 595                                | NM_177622 | 2.94 | 2843  |
| Meox2  | mesenchyme homeobox 2                                  | NM_008584 | 2.82 | -1279 |
| Mkx    | mohawk homeobox                                        | NM_177595 | 2.72 | -3826 |
| Tox    | thymocyte selection-associated high mobility group box | NM_145711 | 2.55 | 194   |
| Robo1  | roundabout homolog 1 (Drosophila)                      | NM_019413 | 2.33 | -5178 |
| Zfp275 | zinc finger protein 275                                | NM_031494 | 2.18 | -4218 |
| Ctbp1  | C-terminal binding protein 1                           | NM_013502 | 1.93 | -117  |
| Msc    | Musculin                                               | NM_010827 | 1.84 | -7889 |
| Bsx    | brain specific homeobox                                | NM_178245 | 1.84 | 71212 |

## Unannotated

| Gene symbol          | Gene full name                                                   | Accession Number | Fold change | ChIP on chip: distance to TSS (nearest peak) (bp) |
|----------------------|------------------------------------------------------------------|------------------|-------------|---------------------------------------------------|
| <b>Downregulated</b> |                                                                  |                  |             |                                                   |
| 4930555F03Rik        | RIKEN cDNA 4930555F03 gene                                       | AK042788         | -25.56      | -6871                                             |
| Ccdc14               | coiled-coil domain containing 14                                 | AK090294         | -8.55       | -379                                              |
| 1700049L16Rik        | RIKEN cDNA 1700049L16 gene                                       | AV045951         | -5.64       | 3703                                              |
| Rps23                | ribosomal protein S23                                            | NM_024175        | -4.29       | -499                                              |
| Gramd3               | GRAM domain containing 3                                         | NM_026240        | -4.24       | 992                                               |
| E030010A14Rik        | RIKEN cDNA E030010A14 gene                                       | NM_183160        | -4.02       | -15773                                            |
| Ttc14                | tetratricopeptide repeat domain 14                               | NM_025978        | -3.08       | -6263                                             |
| BC030307             | cDNA sequence BC030307                                           | NM_001003939     | -2.96       | -906                                              |
| Mphosph10            | M-phase phosphoprotein 10 (U3 small nucleolar ribonucleoprotein) | NM_026483        | -2.92       | -4227                                             |
| 2310008H04Rik        | RIKEN cDNA 2310008H04 gene                                       | NM_146068        | -2.54       | -6490                                             |
| 2810403A07Rik        | RIKEN cDNA 2810403A07 gene                                       | NM_028814        | -2.36       | 1188                                              |
| Hspbap1              | Hspb associated protein 1                                        | NM_175111        | -2.21       | -1516                                             |
| Heca                 | headcase homolog (Drosophila)                                    | BC094026         | -2.1        | -1900                                             |
| 4930578N16Rik        | RIKEN cDNA 4930578N16 gene                                       | NM_001077684     | -2.09       | -1201                                             |
| Gm94                 | predicted gene 94                                                | NM_001033280     | -2.01       | 20759                                             |
| 1700023F06Rik        | RIKEN cDNA 1700023F06 gene                                       | BC100507         | -1.93       | -5045                                             |
| D630037F22Rik        | RIKEN cDNA D630037F22 gene                                       | NM_001033385     | -1.91       | 1857                                              |
| Ccdc52               | coiled-coil domain containing 52                                 | NM_144550        | -1.83       | 1333                                              |

|                    |                                                        |              |       |       |
|--------------------|--------------------------------------------------------|--------------|-------|-------|
| Ldoc1              | leucine zipper; down-regulated in cancer 1             | NM_001018087 | -1.78 | -3120 |
| 4921530L21Rik      | RIKEN cDNA 4921530L21 gene                             | NM_025733    | -1.78 | -117  |
| 2810007J24Rik      | RIKEN cDNA 2810007J24 gene                             | NM_175250    | -1.7  | -4822 |
| <b>Upregulated</b> |                                                        |              |       |       |
| Rnase1             | ribonuclease; RNase A family; 1 (pancreatic)           | NM_011271    | 65.26 | -3253 |
| Rufy3              | RUN and FYVE domain containing 3                       | NM_027530    | 38.13 | -4057 |
| Smgc               | submandibular gland protein C                          | NM_198927    | 34.96 | -189  |
| 1700019D03Rik      | RIKEN cDNA 1700019D03 gene                             | NM_144953    | 34.11 | -1279 |
| Dlgap3             | discs; large (Drosophila) homolog-associated protein 3 | NM_198618    | 33.21 | -3964 |
| E030002O03Rik      | RIKEN cDNA E030002O03 gene                             | NM_172905    | 20.07 | -4547 |
| Rag1               | recombination activating gene 1                        | NM_009019    | 19.16 | 511   |
| AW551984           | expressed sequence AW551984                            | NM_178737    | 13.01 | -5923 |
| Sval1              | seminal vesicle antigen-like 1                         | NM_027832    | 13    | -2934 |
| A1747448           | expressed sequence A1747448                            | NM_001033199 | 12.19 | 50495 |
| Scml2              | sex comb on midleg-like 2 (Drosophila)                 | NM_133194    | 10.86 | -900  |
| D930028M14Rik      | RIKEN cDNA D930028M14 gene                             | AK142847     | 10.18 | -3773 |
| 4933403F05Rik      | RIKEN cDNA 4933403F05 gene                             | NM_153794    | 10.07 | -1696 |
| Ms4a7              | membrane-spanning 4-domains; subfamily A; member 7     | NM_001025610 | 9.29  | -117  |
| 6720456H20Rik      | RIKEN cDNA 6720456H20 gene                             | NM_172600    | 8.49  | -5982 |
| Peg12              | paternally expressed 12                                | NM_013788    | 8.33  | 5635  |
| 1600014C10Rik      | RIKEN cDNA 1600014C10 gene                             | NM_028166    | 8.29  | 822   |
| A730017C20Rik      | RIKEN cDNA A730017C20 gene                             | NM_173759    | 7.98  | 1704  |
| Ttc30b             | tetratricopeptide repeat domain 30B                    | NM_028235    | 7.4   | -1201 |
| Cpne4              | copine IV                                              | NM_028719    | 6.91  | -4353 |
| 1700012B09Rik      | RIKEN cDNA 1700012B09 gene                             | NM_029306    | 6.73  | -5715 |
| Tsga14             | testis specific gene A14                               | NM_031998    | 6.61  | -4625 |
| Samd9l             | sterile alpha motif domain containing 9-like           | XM_620286    | 5.87  | 3658  |
| Sobp               | sine oculis-binding protein homolog (Drosophila)       | NM_175407    | 5.48  | -117  |
| Nup205             | nucleoporin 205                                        | AK014419     | 5.15  | -7802 |
| 5830405N20Rik      | RIKEN cDNA 5830405N20 gene                             | NM_183264    | 5.15  | -1656 |
| Neil3              | nei like 3 (E. coli)                                   | AK031027     | 4.89  | -1863 |
| Ttc29              | tetratricopeptide repeat domain 29                     | NM_183096    | 4.65  | -7818 |

|               |                                                      |              |      |       |
|---------------|------------------------------------------------------|--------------|------|-------|
| 2410066E13Rik | RIKEN cDNA 2410066E13 gene                           | BC042507     | 4.23 | 126   |
| 1810009J06Rik | RIKEN cDNA 1810009J06 gene                           | NM_023707    | 4.02 | -117  |
| 1110006G14Rik | RIKEN cDNA 1110006G14 gene                           | XM_001478810 | 3.82 | -1303 |
| C530028O21Rik | RIKEN cDNA C530028O21 gene                           | NM_175696    | 3.78 | -1683 |
| 6330403K07Rik | RIKEN cDNA 6330403K07 gene                           | NM_134022    | 3.54 | -1532 |
| 3110047P20Rik | RIKEN cDNA 3110047P20 gene                           | XM_132047    | 3.5  | -3271 |
| Ttc12         | tetratricopeptide repeat domain 12                   | NM_172770    | 3.5  | -117  |
| Nap1l5        | nucleosome assembly protein 1-like 5                 | NM_021432    | 3.34 | -6271 |
| 2810032G03Rik | RIKEN cDNA 2810032G03 gene                           | AK029678     | 3.03 | -5282 |
| lqsec3        | IQ motif and Sec7 domain 3                           | NM_001033354 | 2.94 | -3577 |
| 1700086L19Rik | RIKEN cDNA 1700086L19 gene                           | XM_358420    | 2.92 | -779  |
| Popdc3        | popeye domain containing 3                           | NM_024286    | 2.76 | -4314 |
| 1700012B07Rik | RIKEN cDNA 1700012B07 gene                           | AK132924     | 2.72 | 2957  |
| 1700054O13Rik | RIKEN cDNA 1700054O13 gene                           | NM_026096    | 2.67 | -117  |
| Mrps11        | mitochondrial ribosomal protein S11                  | NM_026498    | 2.35 | -6292 |
| 0610040J01Rik | RIKEN cDNA 0610040J01 gene                           | NM_029554    | 2.28 | -3271 |
| Casd1         | CAS1 domain containing 1                             | NM_145398    | 2.24 | -3371 |
| 4933428M09Rik | RIKEN cDNA 4933428M09 gene                           | AK016974     | 2.01 | -1782 |
| Nap1l3        | nucleosome assembly protein 1-like 3                 | NM_138742    | 1.87 | 1636  |
| 3110070M22Rik | RIKEN cDNA 3110070M22 gene                           | AK014250     | 1.85 | 3039  |
| Tsen2         | tRNA splicing endonuclease 2 homolog (S. cerevisiae) | AK044190     | 1.73 | 443   |
| Tdrd7         | tudor domain containing 7                            | NM_146142    | 1.72 | -117  |

## Hair follicle stem cells-associated genes

| Gene symbol          | Gene full name                                              | Accession Number | Fold change | ChIP on chip: distance to TSS (nearest peak) (bp) |
|----------------------|-------------------------------------------------------------|------------------|-------------|---------------------------------------------------|
| <b>Downregulated</b> |                                                             |                  |             |                                                   |
| Cd34                 | CD34 antigen                                                | NM_133654        | -9.94       | -117                                              |
| Tcf7l2 (Tcf4)        | Transcription factor 7-like 2                               | NM_009333        | -5.16       | -3370                                             |
| Sox9                 | SRY-box containing gene 9                                   | NM_011448        | -4.44       | -1927                                             |
| <b>Upregulated</b>   |                                                             |                  |             |                                                   |
| Lgr5                 | leucine rich repeat containing G protein coupled receptor 5 | NM_010195        | 9.62        | -2123                                             |
| S100a9               | S100 calcium binding protein A9 (calgranulin B)             | NM_009114        | 3.25        | -5897                                             |
