# Supplementary material
Source: PubMed Central journal article supplement (PMC4067271)
Supplement: supp_138.22.4843_DEV070284TableS2.pdf [file supp_138.22.4843_DEV070284TableS2.pdf]

Table S2. List of primers

| qRT-PCR primers   |                                                                    |                                                         |                                                    |
|-------------------|--------------------------------------------------------------------|---------------------------------------------------------|----------------------------------------------------|
| Accession number  | Official gene name                                                 | Sense/antisense primers                                 |                                                    |
| NM_010818         | CD200 antigen (Cd200)                                              | TGTTCTTAGGTCCGCCAGTGTG<br>GGGAGTCAGGGATTCTAGCAAGG       |                                                    |
| NM_001111059      | CD34 antigen (Cd34)                                                | GGCCTGAGTGTGGTGTGATGGT<br>GCTCCAAGTCCGACGGTTCA          |                                                    |
| NM_010703         | Lymphoid enhancer binding factor 1 (Lef1)                          | ACTCCAAGCAAGGCATGTC<br>GGGTGATCTGTCCAACGC               |                                                    |
| NM_010195         | Leucine rich repeat containing G protein coupled receptor 5 (Lgr5) | CCAATGGAATAAAGACGACGGCAACA<br>GGGCCTTCAGGTCTTCTCAAAGTCA |                                                    |
| NM_010710         | LIM homeobox protein 2 (Lhx2)                                      | CCTACTACAACGGCGTGGGCACTGT<br>GTCACGATCCAGGTGTTCCAGCATCG |                                                    |
| NM_011448         | SRY-box containing gene 9 (Sox9)                                   | GAGTGTCCCTTAGCCTTCTTG<br>CCTTCTTCTTCTTCTTCTTCC          |                                                    |
| NM_009332         | Transcription factor 7-like 1 (Tcf7l1/Tcf3)                        | CTTCTGATGATTCCAGAC<br>CTTGTGTCCTTGACTGTAG               |                                                    |
| NM_009333         | Transcription factor 7-like 2 (Tcf7l2/Tcf4)                        | AAGACTTGAACATTAGCGAGAG<br>AAGAGCACAGGGCAGTTG            |                                                    |
| NM_008084         | Glyceraldehyde-3-phosphate dehydrogenase (Gapdh)                   | GGTGTGAACGGATTTGGCCGTATTG<br>CCGTTGAATTTGCCGTGAGTGGAGT  |                                                    |
| ChIP-qPCR primers |                                                                    |                                                         |                                                    |
| Accession number  | Gene symbol                                                        | Binding site                                            | Sense/antisense primers                            |
| NM_011448         | <i>Sox9</i>                                                        | Site A                                                  | CTCTGGATGTTGCTGAAAATTG<br>GCCACTGTCAGATGTATTTAAAC  |
|                   |                                                                    | Site B                                                  | CCAAATAACAAATGCCCACTTC<br>TAGAGCAAGGTTGGCTAAGG     |
|                   |                                                                    | Control                                                 | AAGCTGGCAAAGTTGATC<br>GTTGGGTGGCAAGTATTG           |
| NM_009333         | <i>Tcf4</i>                                                        | Site A                                                  | TCCAAGAGATGAGAGAGCAG<br>CAGTTTATAGATTTGGCAAGACC    |
|                   |                                                                    | Site B                                                  | CTTGCTCTCTCTTCTTCC<br>GGATGCTAAGGGCTCTTG           |
|                   |                                                                    | Site C                                                  | TGTTGAAACCCCAAATTCTC<br>CCAAACCGTGTCTCTGTC         |
| NM_010195         | <i>Lgr5</i>                                                        | Control                                                 | AGGCGTTGATGGAATGTG<br>CAGGAGTGGTGTCTTAGC           |
|                   |                                                                    | Site A                                                  | CTCCTTTAGAACATATGGATACAG<br>AGAGTATAGAGCCGTTATTTG  |
|                   |                                                                    | Site B                                                  | ACCTCGTATGTGACTGTGTATG<br>TGAGTAGAGATGTATGTGGATGAC |
|                   |                                                                    | Control                                                 | TGTTCCAGTTTCGGCTTTC<br>TGTTGCTCATTGTCTCCAGAAG      |
